# Supplementary material for: Characterization of the planar differential mobility analyzer (DMA P5): resolving power, transmission efficiency and its application to atmospheric cluster measurements
Source: Copernicus journal article supplement (doi:10.5194/amt-2023-147), 2023-07-18
Supplement: Supplementary file 1 [file amt-2023-147-supplement.pdf]

## **Supporting Information for:**

# **Characterization of the planar differential mobility analyzer (DMA P5): resolving power, transmission efficiency and its application to atmospheric cluster measurements**

**Zhengning Xu<sup>1</sup>, Jian Gao<sup>1</sup>, Zhuanghao Xu<sup>1</sup>, Michel Attoui<sup>3</sup>, Xiangyu Pei<sup>1</sup>, Mario Amogonzález<sup>4</sup>, Kewei Zhang<sup>1</sup>, Zhibin Wang<sup>1,2,5\*</sup>**

<sup>1</sup>College of Environmental and Resource Sciences, Zhejiang Provincial Key Laboratory of Organic Pollution Process and Control, Zhejiang University, Hangzhou 310058, China

<sup>2</sup>ZJU-Hangzhou Global Scientific and Technological Innovation Center, Zhejiang University, Hangzhou 311215, China

<sup>3</sup>University Paris-Est Creteil, University Paris-Diderot, LISA, UMR CNRS 7583, France

<sup>4</sup>MION S.L., Avda. Francisco Valles 8, Boecillo, Valladolid, 47151, Spain

<sup>5</sup>Key Laboratory of Environment Remediation and Ecological Health, Ministry of Education, Zhejiang University, Hangzhou, 310058, China

*Correspondence to:* Zhibin Wang ([wangzhibin@zju.edu.cn](mailto:wangzhibin@zju.edu.cn))

## Section 1: Theoretical derivation of the operation principle of planar DMA

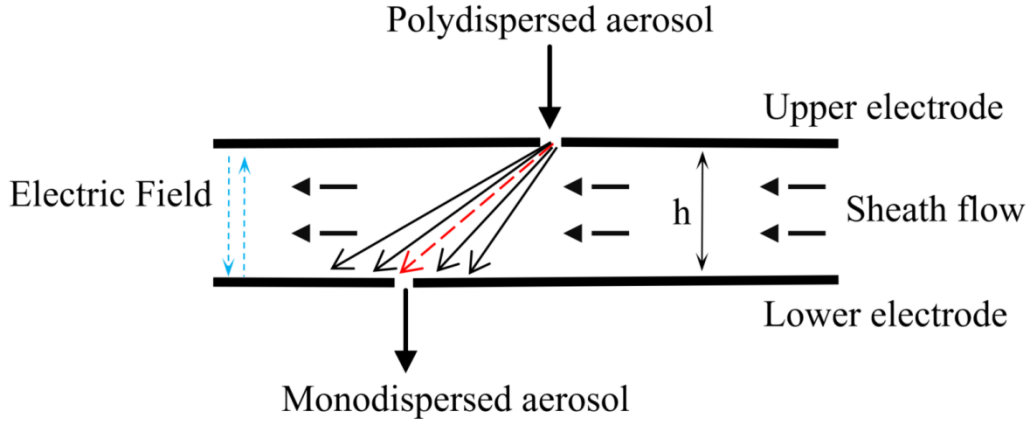

**Figure S1 operation principle of planar DMA**

$V_{DMA}$ : Voltage between the two electrodes;

$h$ : Distance between the two electrodes;

The electric field between the two electrodes:  $E = \frac{V_{DMA}}{h}$ .

During the scanning period of planar DMA, the electric field is applied on the z-direction, a laminar particle-free sheath flow is circulating through the capacitor along the x-direction at the flow rate of  $Q_{sh}$ , and the aerosol flow is fed into the capacitor through input slit located at the top electrode at the flow rate of  $Q_a$ . The direction of aerosol flow is parallel to the electric field and perpendicular to the sheath flow.

The particle velocity in x-direction is given as:  $u_x(z) = \frac{dx}{dt}$

The equation can be transformed as  $dx = u_x(z) \cdot dt$  (1)

The particle velocity in z-direction is given as:

$$u_z = \frac{dz}{dt} = \frac{Q_a}{S_{slit}} + E \cdot Z_p = \frac{Q_a}{S_{slit}} + \frac{V_{DMA} \cdot Z_p}{h}$$

where  $Z_p$  represent the electric mobility of the particle and  $S_{slit}$  represent the cross-section area of inlet slit.

Since  $\frac{Q_a}{S_{slit}}$  is much smaller than  $\frac{V_{DMA} \cdot Z_p}{h}$ , this equation can be written as:  $u_z = \frac{dz}{dt} =$

$$\frac{V_{DMA} \cdot Z_p}{h},$$

The equation can be transformed as  $d_t = \frac{h}{V_{DMA} \cdot Z_p} \cdot d_z$  (2)

Combined equation (1) and (2), we can get the relation that

$$d_x = \frac{u_x(z) \cdot h}{V_{DMA} \cdot Z_p} \cdot d_z \quad (3)$$

Integrating equation (3), we can get the equation that  $\int_0^L d_x = \frac{h}{V_{DMA} \cdot Z_p} \int_0^h u_x(z) d_z$

where L represent the distance between the inlet slit and the monodispersed particle exit.

Assuming that  $\bar{u}_x(z) = \frac{Q_{sh}}{w \cdot h}$ , where w represents the width of the capacitor and  $w \cdot h$  represent the cross-section area of the capacitor, the integral equation can be transformed as  $\int_0^L d_x = L = \frac{Q_{sh}}{w \cdot h} \cdot \frac{h}{V_{DMA} \cdot Z_p} \int_0^h d_z = \frac{Q_{sh} \cdot h}{w \cdot V_{DMA} \cdot Z_p}$  (4)

Equation (4) can be written as  $Z_p = \frac{Q_{sh} \cdot h}{w \cdot U \cdot L}$ , and combined with the assumption that  $Q_{sh} = \bar{u}_x(z) \cdot w \cdot h$ , we can get the expression of  $Z_p = \frac{\bar{u}_x(z) \cdot h^2}{V_{DMA} \cdot L}$  (5)

In equation (5)  $\bar{u}_x(z)$  represent the average speed of sheath flow along z-direction; L and h represent the horizontal distance of inlet the exit and between the two electrodes, respectively;  $V_{DMA}$  represent the voltage applied between the two electrodes.

Account for the planar DMA P5, the sheath flow speed is uniform along z-direction ( $\bar{u}_x(z) = u_x$ ), the physical dimension of L and h are 40mm and 10mm, respectively. The relation of the electric mobility ( $Z_p$ ) and the voltage applied by planar DMA P5 ( $V_{DMA}$ ) can be expressed as:

$$Z_p = \frac{u_x \cdot h^2}{V_{DMA} \cdot L} \quad (6)$$

## Section 2: Mobility diameter calculation

Calculation of diameter from mobility (Tammet, 1995; Wiedensohler et al., 2012)

$$Z = \frac{neC_c(D_p)}{3\pi\mu D_p}$$

$$C_c = 1 + \frac{2\lambda}{D_p} \left( 1.165 + 0.483 \exp \left( -0.997 \frac{D_p}{2\lambda} \right) \right)$$

$$\lambda = \lambda_0 \left( \frac{T}{T_0} \right)^2 \left( \frac{P_0}{P} \right) \left( \frac{T_0 + 110.4 K}{T + 110.4 K} \right)$$

$$\mu = \mu_0 \left( \frac{T}{T_0} \right)^{3/2} \left( \frac{T_0 + 110.4 K}{T + 110.4 K} \right)$$

n is Number of elementary charges on the particle; e is Elementary charge =  $1.60 \times 10^{-19}$  C;  $C_c$  is Cunningham slip correction;  $D_p$  is Mobility diameter;  $\mu$  is Dynamic gas viscosity;  $\lambda$  is Mean free path of gas; T is Temperature, and is set as 298.15 K; P is Pressure, assuming P equals to 1atm;  $T_0$  is Reference temperature (296.15 K);  $P_0$  is the Reference pressure = 1atm = 101325 Pa;  $\lambda_0$  is Mean free path at 296.15K and 1atm =  $67.3 \times 10^{-9}$  m;  $\mu_0$  is the gas viscosity at 296.15K and 1atm, which is equals to  $1.83245 \times 10^{-5}$  kg m<sup>-1</sup> s<sup>-1</sup>

## Section 3: Supplementary figures and tables

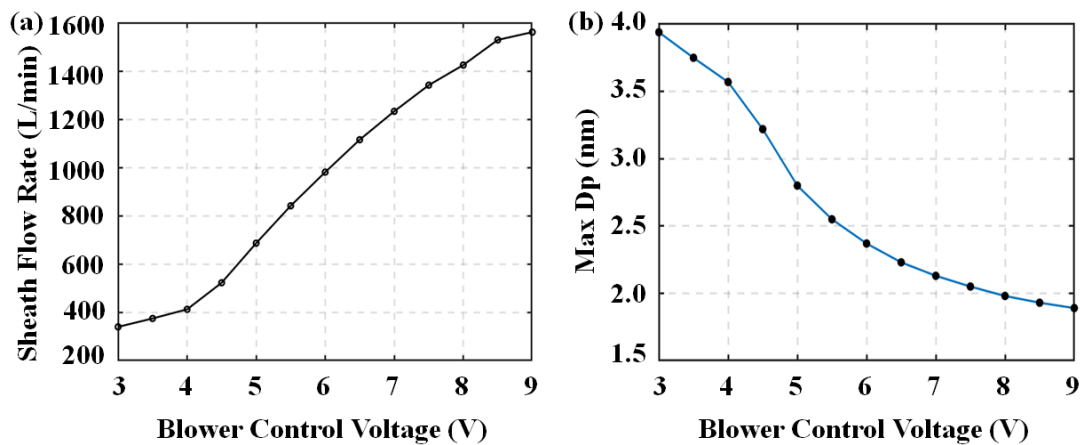

Figure S2 The relation of blower control voltage with sheath flow rate and corresponding DMA P5 sizing range

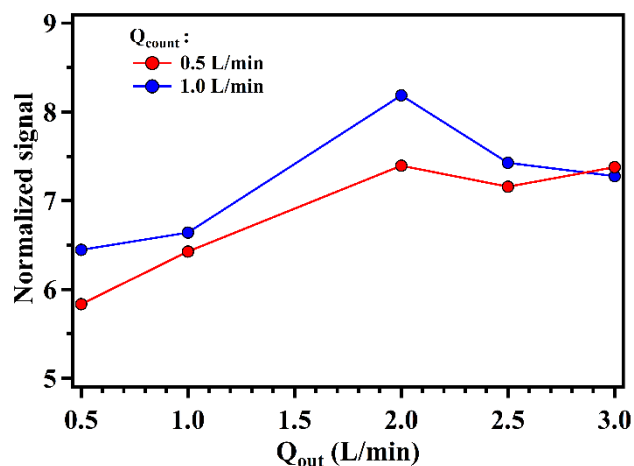

Figure S3  $\text{THA}^+$  Signal intensity normalized by monodispersed flow rate

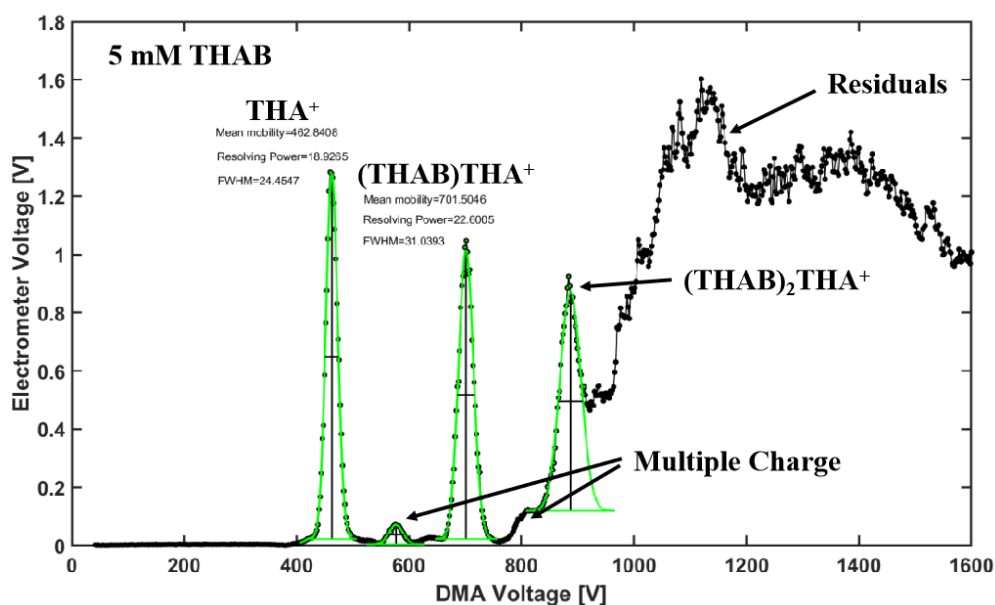

Figure S4 Positive ion mobility spectrum of electrospayed THAB solution obtained from HalfMini + Lynx E12

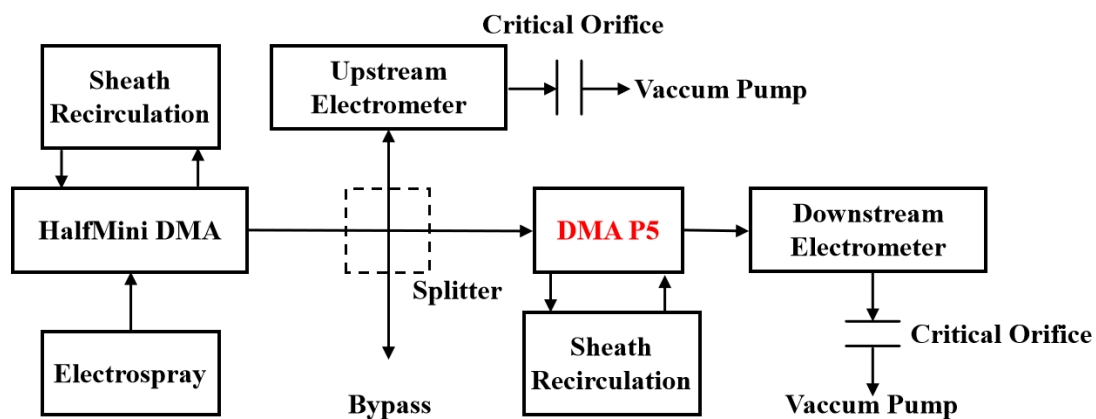

Figure S5 Schematic diagram of tandem DMA system

**Table S1 Inverse mobilities 1/Z (V s/cm<sup>2</sup>) for four tetra-alkyl ammonium positive ions**

| Peak <sup>+</sup>                | TMAI      |            | TBAI      |            | THAB      |            | TDAB      |            |
|----------------------------------|-----------|------------|-----------|------------|-----------|------------|-----------|------------|
|                                  | this work | Ude et al. |
|                                  |           | 2005       |           | 2005       |           | 2005       |           | 2005       |
| A <sup>+</sup>                   | 0.458     | 0.459      | 0.723     | 0.718      | 1.03      | 1.03       | 1.269     | 1.285      |
| A <sup>+</sup> (AB)              | 0.667     | 0.677      | 1.164     | 1.153      | 1.533     | 1.529      | 1.811     | 1.846      |
| A <sup>+</sup> (AB) <sub>2</sub> | -         |            | 1.475     | 1.450      | 1.898     | 1.893      | -         |            |

**Table S2 Inverse mobilities 1/Z (V s/cm<sup>2</sup>) for four tetra-alkyl ammonium negative ions**

| Peak <sup>-</sup> | TMAI  | TBAI  | THAB  | TDAB  |
|-------------------|-------|-------|-------|-------|
| B <sup>-</sup>    | 0.423 | 0.422 | 0.436 | 0.436 |

## References

- Tammet, H.: SIZE AND MOBILITY OF NANOMETER PARTICLES, CLUSTERS AND IONS, J. Aerosol Sci., 6, (3), 459-475, [https://doi.org/10.1016/0021-8502\(94\)00121-E](https://doi.org/10.1016/0021-8502(94)00121-E), 1995.
- Wiedensohler, A., Birmili, W., Nowak, A., Sonntag, A., Weinhold, K., Merkel, M., et al.: Mobility particle size spectrometers: harmonization of technical standards and data structure to facilitate high quality long-term observations of atmospheric particle number size distributions, Atmos. Meas. Tech., 5, (3), 657-685, 2012.
